# Supplementary material for: Antibody Blockade of Semaphorin 4D Promotes Immune Infiltration into Tumor and Enhances Response to Other Immunomodulatory Therapies
Source: Oxford University Press journal article supplement (doi:10.1158/2326-6066.cir-14-0171), 2015-01-23
Supplement: 23266066cir140171-sup-137904_1_supp_2798534_nh1rn1.doc [file 23266066cir140171-sup-137904_1_supp_2798534_nh1rn1.doc]

**SUPPLEMENTAL METHODS:**

**Analysis and statistics for tumor growth, survival and CR:** Mean tumor volumes are shown with error bars depicting standard error of mean (SEM). Significance of growth kinetics was determined using 2way ANOVA to determine treatment effect over time.

Predetermined time to endpoint was defined as tumor volume ≥ 800 or 1000 mm3 for Tubo.A5 and Colon26 models, respectively. The time to endpoint (TTE) for each mouse was calculated as: TTE = (log10 (endpoint volume)-b)/m, where TTE is expressed in days, endpoint volume is in mm3, b is the intercept, and m is the slope of the line obtained by linear regression of a log-transformed tumor growth data set. The data set for each mouse is comprised of the first observation that exceeded the study endpoint volume and the four consecutive observations that immediately preceded the endpoint volume. TTE was extrapolated for each animal and median TTE was calculated for the group. Survival, defined as calculated TTE, was depicted by the Kaplan-Meier method. Tumor growth delay (TGD) is defined as the increase in the median TTE in a treatment group compared to the control group, using the following formula: % TGD= ((T-C)/C) x 100. Logrank (Mantel-Cox) tests determined the significance of the difference in overall survival, based on TTE values. Percent tumor growth inhibition (TGI) was defined as the difference between the Median Tumor Volume (MTV) of a test group and control group, using the formula: % TGI = ((MTVcontrol-MTVtreated/MTVcontrol)) x 100.

A complete tumor regression (CR) was defined as a tumor volume of ≥ 50 mm3 for 3 consecutive measurements, followed subsequently by a tumor volume of ≤50 mm3 for at least 3 consecutive measurements during the course of the study. Significance of CR was analyzed using Fisher’s Exact test.

Two-sided t-tests were employed to analyze assay replicates from ELISPOT, CBA, FACS, and IHC analyses. Parametric t-tests were used when applicable; validity of parametric t test was confirmed if data are normally distributed (D'Agostino & Pearson omnibus normality test) and variances are significantly different. If variance and /or distribution were not significant (ns) or if sample size was too small, a non-parametric t-test, such as Mann Whitney, was applied.

**Immunohistochemistry methods**: PFA-fixed, paraffin-embedded sections (5 micron) were deparaffinized and rehydrated, followed by a 20-min boil with Target Retrieval Solution (Dako, Carpinteria, CA) and 30-min cooling. Slides were washed twice with PBS containing 0.05% Tween-20 (TPBS), then endogenous peroxidases were inactivated with Dual Enzyme Block (Dako, Carpinteria, CA) for 10 min. Washed slides were blocked by 20-min incubation with 2.5% normal goat serum in TPBS. Washed slides were incubated for 60 min with primary antibody at optimized concentrations. Washed slides were then incubated for 20 min with appropriate fluorescent conjugated or HRP conjugated secondary antibody. This was followed by either a 5 min DAB detection (Dako, Carpinteria, CA) or DAPI incubation. Sections were counterstained with Harris hematoxylin, dehydrated, and non-aqueous mounted with Permount for chromogen stained slides or aqueous mounted for fluorescent stained slides. Slides were imaged at 20X magnification using a Retiga QICAM-12 bit camera (brightfield) or QICAM Aqua- 16bit (Fluorescent) coupled to an Olympus Ix50 microscope.

**Supplementary Figure S1: SEMA4D and PLXNB1 are highly expressed in human cancer.** The bar graph summarizes IHC data from Sema4D staining in 192 human tumor tissue samples using **A.** mouse anti-Sema4D polyclonal antibody or **B.** goat anti-Plexin-B1 antibody. The staining was scored on a scale of 0 (negative), blush (B),1, 2, 3 – correlating to intensity of staining within the tumor.

**Supplementary Figure S2: SEMA4D gradient at tumor leading edge.** Tumors were isolated from Colon26 **(A)** or Tubo.A5 **(B)** tumor bearing mice. FFPE tumors were stained for expression of SEMA4D. Low magnification images are shown to demonstrate strong SEMA4D staining at the invasive tumor margins (brackets).

**Supplementary Figure S3: Tumor volumes of mice selected for immune cell characterization and functional assays.** Colon26 tumor bearing mice were treated with anti-SEMA4D or Control Ig and/or anti-CTLA-4. Anti-SEMA4D treatment resulted in 48% tumor growth inhibition (TGI) and treatment with anti-CTLA-4 antibodies resulted in similar TGI; all were statistically significant compared to the Control IgG (p<0.01). Tissues were harvested for IHC; TIL and splenocytes were isolated for FACS and functional assays on days 15-17, a time point selected to assess active immune responses within the tumor during the course of treatment and prior to tumor regressions. Individual tumor volumes for groups of mice at the time of sacrifice are shown (open circles represent tumor volume of concurrent control group, but these samples were not assessed for IHC). Although no significant difference in tumor volume was observed between anti-CTLA-4 and combination therapy at the time of harvest, significant functional differences are described in Figure 3.

**Supplementary Figure S4: CD8+ T cells are required for anti-SEMA4D induced specific immune memory response to Colon26.** Treatment of Colon26 tumor-bearing mice with anti-CTLA-4 and anti-SEMA4D (3, 10 or 50 mg/kg IP, weekly) resulted in complete tumor regression in 23 mice. Regresssor mice were divided into two groups treated with **A.** control Rat Ig or **B.** anti-CD8 (0.15 mg IP, days -4, 3, 10, and 17 days post-challenge) and challenged on day 85 with viable Colon26 (500,000 cells) on the opposite flank; **C.** tumors were also implanted into 6 naïve mice on the same day. Effective T cell depletion was confirmed by FACS analysis on whole blood of treated mice (data not shown). Mice were protected from tumor re-challenge only in the presence of CD8+ T cells.

**Supplementary Figure S5: Anti-SEMA4D treatment increases the Teff:Treg ratio.** Colon26 **(A.)** or Tubo.A5 **(B.)** tumors were isolated from Balb/c mice following treatment with anti-SEMA4D/MAb67 or Control Ig. TIL were pooled from each treatment group and CD45+ TIL were assessed by FACS. Activated T effectors (CD8+CD69+) and regulatory T cells (CD4+CD25+), as a percent of total lymphocytes are shown in left and middle panels. The ratio of activated T effectors (CD8+CD69+) to regulatory T cells (CD4+CD25+) as a percent of total lymphocytes was calculated and is shown in right panels.

**Supplementary Figure S6: Minimal effective dose of MAb67 is ~ 3 mg/kg corresponds with cSEMA4D T cell saturation as a PD marker. A.** Treatment of Colon26 tumors (n=15) with anti-CTLA-4 + anti-SEMA4D results in maximal tumor growth delay (119%) compared to anti-CTLA-4 monotherapy when doses of anti-SEMA4D/MAb 67 are ≥ 3 mg/kg; significance of anti-CTLA-4 monotherapy compared to combination with MAb67 at 10 mg/kg, p=0.0101 and at 3 mg/kg, p=0.0571. Effect of dosing between 3-50 mg/kg was not significantly different from one another. In contrast, when anti-CTLA-4 was administered in combination with 0.3 mg/kg MAb67, the inhibitory effect was not significantly different than anti-CTLA-4 monotherapy (p=0.4945), but was significantly less than the combination with 10 mg/kg MAb 67 (p=0.0325), demonstrating that 0.3 mg/kg MAb67 is too low to enhance effects of anti-CTLA-4. **B.** Treatment of Tubo.A5 tumor with 3 mg/kg MAb67 resulted in maximal tumor growth delay and 73% (11/15) CR, which was statistically significant compared to control IgG (p<0.0001). In contrast, 1 mg/kg MAb67 was ineffective and did not significantly delay tumor growth (p=0.4839). In additional studies, results from doses of 50 and 10 mg/kg MAb67 were comparable to 3 mg/kg, and 1 mg/kg was again ineffective in 2/2 experiments conducted in Tubo.A5. **C.** Using flow cytometry, mouse T cells in whole blood were analyzed for the presence of drug (MAb 67) bound to membrane SEMA4D by staining with anti-mouse CD3-FITC and anti-mouse IgG1-APC. For each sample, three staining conditions were utilized to obtain “% saturation”; these conditions included: a = isotype control, b = anti-mouse IgG1 to determine whether the cell is bound by MAb 67, and c = a replicate of condition b with excess MAb 67 added to determine the maximum binding. The % saturation value [(b – a) / (c – a)] represents the % of cellular SEMA4D is saturated at that specific time point. Collectively, these data support that MAb67 levels below 3 mg/kg do not saturate cSEMA4D on circulating T cells and are not effective at significantly reducing tumor burden.

**Supplementary Figure S7:**  **Single agent anti-SEMA4D is highly effective, while immune checkpoint inhibitor antibodies are ineffective in mammary carcinoma model.** **A.** Tubo.A5 tumor bearing mice were treated with anti-SEMA4D/MAb67 or Control Mouse IgG1 antibody. MAb67 resulted in the maximum possible Tumor Growth Delay (TGD) of 178% (p<0.0001) and 85% CR (p<0.0001). Anti-PD-1 (250 ug IP, twice weekly) and/or anti-CTLA-4 (100/50/50 ug q3D x 3) antibody treatments were initiated at tumor volume ~ 100mm3 (day21). Anti-PD-1 treatment was ineffective; anti-CTLA4 treatment resulted in only 14% TGD, p=0.0497 and 23% CR (ns). The combination of anti-PD-1+ anti-CTLA-4 resulted in 38%* TGD and 14% CR (ns). **B.** Tubo.A5 cells (15,000) were implanted in SCID mice and subsequently treated with MAb 67 (n=15) or Control Ig (n=14) (10 mg/kg IP, weekly starting at 6 dpi). **C.** Colon26 cells were implanted subcutaneously into SCID (100,000 cells) mice and subsequently treated with antibodies (50 mg/kg IP, weekly at 2 dpi) (n=20). 12% TGD (p=0.0356) was observed in Tubo.A5-bearing SCID mice treated with MAb 67. MAb 67 did not affect growth of Colon26 in SCID mice. Data are representative of one of two independent studies for each model in SCID mice.

**Supplementary Figure S8: Proposed mechanisms of action for SEMA4D blockade.** Soluble SEMA4D is released into the tumor microenvironment by proteolytic cleavage from SEMA4D expressing cells, including tumor associated macrophage and monocytes. SEMA4D binding to its receptor PLXNB1 can directly mediate signaling through the RhoA pathway to affect cytoskeletal rearrangements and cellular movement. In addition, in cells expressing both PLXNB1 and ERBB2 or Met receptor tyrosine kinases, these oncogenic pathways can be transactivated by SEMA4D-crosslinked PLXNB1. SEMA4D can, therefore, modulate tumor growth via two independent pathways: 1. Regulation of the balance and distribution of inflammatory and tolerance-inducing APC, and recruitment of cytotoxic CD8+ T cells into tumor stroma. 2. Crosslinking of Plexin-B1 receptor on tumor cells by SEMA4D transactivates oncogenic ErbB2 and MET membrane receptor kinases.
